# Supplementary material
Source: PubMed Central journal article supplement (PMC3443811)
Supplement: supp_186.4.369_Meintjes_ODS.pdf [file supp_186.4.369_Meintjes_ODS.pdf]

**Corticosteroid modulated immune activation in the TB immune reconstitution inflammatory syndrome**

Graeme Meintjes, Keira H. Skolimowska, Katalin A. Wilkinson, Kerry Matthews, Rebecca Tadokera, Anali Conesa-Botella, Ronnett Seldon, Molebogeng X. Rangaka, Kevin Rebe, Dominique J. Pepper, Chelsea Morroni, Robert Colebunders, Gary Maartens, Robert J. Wilkinson

**MATERIAL FOR ONLINE DATA SUPPLEMENT**

**Supplementary Tables 1, 2, 3 and 4**

**Supplementary Table 1: Log fold gene induction after 24 hrs restimulation of PBMC with heat-killed H37Rv *Mycobacterium tuberculosis* at weeks 0, 2 and 4 on clinical trial for placebo-treated and prednisone-treated participants**

| PLACEBO-TREATED               |                 |                 |                 |                     |                     | PREDNISONE-TREATED |                  |                  |                     |                     |
|-------------------------------|-----------------|-----------------|-----------------|---------------------|---------------------|--------------------|------------------|------------------|---------------------|---------------------|
| Cytokine/<br>chemokine        | Week 0<br>N = 9 | Week 2<br>N = 8 | Week 4<br>N = 6 | p-value<br>(0 vs 2) | p-value<br>(0 vs 4) | Week 0<br>N = 16   | Week 2<br>N = 14 | Week 4<br>N = 15 | p-value<br>(0 vs 2) | p-value<br>(0 vs 4) |
| <b>IL-1<math>\beta</math></b> | 2.25 (0.80)     | 2.35 (0.41)     | 1.95 (0.76)     | 0.46                | 0.03 *              | 2.29 (1.11)        | 2.28 (0.94)      | 2.14 (0.74)      | 0.89                | 0.34                |
| <b>IL-2</b>                   | 0.97 (0.68)     | 0.99 (0.43)     | 0.97 (0.81)     | 0.57                | 0.76                | 0.78 (0.74)        | 0.97 (0.55)      | 0.68 (0.67)      | 0.45                | 0.61                |
| <b>IL-4</b>                   | -0.13 (0.49)    | -0.09 (0.34)    | 0.04 (0.30)     | 0.75                | 0.79                | 0.32 (0.42)        | 0.12 (0.52)      | -0.26 (0.29)     | 0.43                | 0.002 *             |
| <b>IL-6</b>                   | 2.63 (1.37)     | 2.48 (1.10)     | 2.46 (1.15)     | 0.94                | 0.01 *              | 2.75 (1.56)        | 2.69 (1.19)      | 2.26 (1.11)      | 0.68                | 0.18                |
| <b>IL-8</b>                   | 1.29 (0.54)     | 1.15 (0.45)     | 1.14 (0.52)     | 0.91                | 0.26                | 1.52 (0.83)        | 1.33 (0.62)      | 1.12 (0.66)      | 0.34                | 0.09                |
| <b>IL-10</b>                  | 0.24 (0.84)     | -0.04 (0.82)    | 0.41 (1.05)     | 0.23                | 0.93                | 0.38 (0.80)        | 0.13 (0.69)      | -0.72 (1.08)     | 0.46                | 0.006 *             |
| <b>IL-12p40</b>               | 2.02 (0.80)     | 2.24 (0.62)     | 2.47 (0.44)     | 0.41                | 0.62                | 2.40 (0.82)        | 2.04 (1.11)      | 2.21 (1.23)      | 0.45                | 0.84                |
| <b>IL-13</b>                  | 2.24 (1.06)     | 2.17 (0.96)     | 1.94 (0.96)     | 0.98                | 0.004 *             | 2.29 (0.86)        | 1.89 (0.90)      | 1.97 (0.75)      | 0.31                | 0.22                |
| <b>IL-15</b>                  | 0.43 (0.36)     | 0.24 (0.54)     | 0.63 (0.44)     | 0.17                | 0.38                | 0.67 (0.53)        | 0.73 (0.40)      | 0.50 (0.49)      | 0.51                | 0.33                |
| <b>IL-17A</b>                 | 1.53 (0.64)     | 1.46 (0.75)     | 1.52 (0.83)     | 0.79                | 0.27                | 1.28 (1.07)        | 1.11 (0.65)      | 1.10 (0.93)      | 0.63                | 0.65                |
| <b>IL-22</b>                  | 1.98 (0.89)     | 1.98 (0.66)     | 2.27 (0.80)     | 0.68                | 0.02 *              | 1.90 (1.11)        | 1.76 (0.77)      | 1.83 (0.82)      | 0.67                | 0.80                |

|                               |              |              |              |      |         |              |             |              |      |      |
|-------------------------------|--------------|--------------|--------------|------|---------|--------------|-------------|--------------|------|------|
| <b>IL-27</b>                  | 1.42 (0.62)  | 1.28 (0.49)  | 2.00 (0.73)  | 0.95 | 0.37    | 1.39 (0.79)  | 1.52 (0.66) | 1.34 (1.21)  | 0.82 | 0.72 |
| <b>TNF<math>\alpha</math></b> | 1.60 (0.30)  | 1.27 (0.80)  | 1.47 (0.42)  | 0.33 | 0.26    | 1.45 (0.65)  | 1.45 (0.32) | 1.31 (0.64)  | 0.74 | 0.42 |
| <b>IFN<math>\gamma</math></b> | 1.50 (0.78)  | 1.82 (0.53)  | 1.78 (0.42)  | 0.09 | 0.35    | 1.45 (0.88)  | 1.43 (0.70) | 1.25 (0.71)  | 0.73 | 0.44 |
| <b>GM-CSF</b>                 | 2.55 (1.43)  | 2.62 (1.09)  | 2.00 (1.10)  | 0.88 | 0.049 * | 3.01 (1.45)  | 2.74 (1.19) | 2.48 (0.91)  | 0.32 | 0.15 |
| <b>CCL3</b>                   | 1.46 (0.51)  | 1.41 (0.30)  | 1.09 (0.68)  | 0.74 | 0.04 *  | 1.50 (0.73)  | 1.40 (0.54) | 1.33 (0.58)  | 0.48 | 0.29 |
| <b>CCL4</b>                   | 1.11 (0.32)  | 0.93 (0.22)  | 0.82 (0.35)  | 0.31 | 0.09    | 1.17 (0.59)  | 1.02 (0.45) | 0.95 (0.54)  | 0.41 | 0.26 |
| <b>CCL5</b>                   | -0.09 (0.16) | -0.21 (0.26) | -0.11 (0.15) | 0.21 | 0.73    | -0.02 (0.27) | 0.00 (0.30) | -0.17 (0.39) | 0.61 | 0.24 |

**Legend for Supplementary Table 1:**

Mean log fold-induction (+/- standard deviation) in gene expression of 18 cytokines and chemokines after 24 hrs restimulation of PBMC with heat-killed H37Rv *Mycobacterium tuberculosis* are shown for placebo and prednisone-treated patients at weeks 0, 2 and 4 on the clinical trial. P-values were calculated for comparisons between 0 and 2 weeks values and 0 and 4 week values for each treatment group separately using Student's paired t-tests. Two patients in the placebo-treated arm switched to open label prednisone at week 2 and their week 4 samples were thus excluded from analysis.

Significant differences are indicated with \*. After Bonferroni correction for multiple comparisons ( $p_{corr} = p \times 18 - 1 = p \times 17$ ) only the change in IL-4 in prednisone-treated patients between week 0 and 4 remained significant ( $p_{corr} = 0.03$ ).

**Supplementary Table 2: Changes in concentrations of cytokines and chemokines in supernatants of cell cultures after restimulation of PBMC with heat-killed H37Rv *Mycobacterium tuberculosis* for 24 hrs assessed by Luminex multiplex assay**

| PLACEBO-TREATED               |                       |                       |                       |                     |                     | PREDNISONE-TREATED    |                       |                      |                     |                     |
|-------------------------------|-----------------------|-----------------------|-----------------------|---------------------|---------------------|-----------------------|-----------------------|----------------------|---------------------|---------------------|
| Cytokine/<br>chemokine        | Week 0<br>N = 12      | Week 2<br>N = 11      | Week 4<br>N = 9       | p-value<br>(0 vs 2) | p-value<br>(0 vs 4) | Week 0<br>N = 17      | Week 2<br>N = 15      | Week 4<br>N = 15     | p-value<br>(0 vs 2) | p-value<br>(0 vs 4) |
| <b>IL-1<math>\beta</math></b> | 1556<br>298.1 - 5182  | 495<br>226.4 - 2915   | 184.6<br>65 - 1788    | 0.70                | 0.01 *              | 2375<br>112.2 - 3623  | 112.4<br>0 - 699.4    | 235.8<br>98 - 456.8  | 0.01 *              | 0.03 *              |
| <b>IL-2</b>                   | 94.6<br>9.1 - 491.3   | 101.8<br>51.7 - 295.5 | 215.9<br>69.8 - 529.8 | 0.28                | 0.82                | 55.1<br>9.9 - 291     | 64.8<br>13.7 - 206.3  | 65.2<br>5.1 - 126    | 0.45                | 0.71                |
| <b>IL-4</b>                   | 0<br>0 - 0            | 0<br>0 - 0            | 0<br>0 - 0            | 0.75                | 0.50                | 0<br>0 - 1.6          | 0<br>0 - 0            | 0<br>0 - 0           | 0.63                | 0.13                |
| <b>IL-5</b>                   | 0<br>0 - 0            | 0<br>0 - 0            | 0<br>0 - 0            | 0.50                | 1.0                 | 0<br>0 - 0            | 0<br>0 - 0            | 0<br>0 - 0           | 1.0                 | 1.0                 |
| <b>IL-6</b>                   | 17957<br>5088 - 29776 | 13026<br>2954 - 24499 | 6884<br>1119 - 15462  | 0.64                | 0.01 *              | 17084<br>3805 - 33389 | 3213<br>868.2 - 16139 | 6496<br>3411 - 12239 | 0.02 *              | 0.04 *              |
| <b>IL-10</b>                  | 249.1<br>139.3 - 2082 | 465.9<br>130.5 - 1297 | 190.4<br>77.1 - 1617  | 1.0                 | 0.02 *              | 751.1<br>160.9 - 1591 | 124.3<br>55.4 - 963.7 | 311.5<br>187 - 638.8 | 0.14                | 0.06                |
| <b>IL-12p40</b>               | 41.3<br>27.2 - 207.4  | 54.2<br>1.0 - 103.3   | 29.0<br>4.3 - 59.4    | 0.83                | 0.73                | 7.4<br>0 - 327.7      | 7.1<br>0 - 76.4       | 3.2<br>0 - 85.1      | 0.08                | 0.91                |
| <b>IL-13</b>                  | 10.1<br>0.2 - 62      | 9.4<br>2.8 - 67.9     | 3.5<br>-5.1 - 13.8    | 0.03 *              | 0.20                | 3.8<br>2 - 14.3       | 5.4<br>2.1 - 7.1      | 5.3<br>0.6 - 14      | 0.49                | 0.98                |
| <b>IL-15</b>                  | 0<br>0 - 2.6          | 0<br>0 - 3.8          | 0<br>0 - 0.3          | 1.0                 | 0.81                | 0<br>0 - 0.4          | 0<br>0 - 0            | 0<br>0 - 0           | 0.20                | 0.84                |
| <b>TNF<math>\alpha</math></b> | 3799<br>1010 - 16035  | 4749<br>947 - 13480   | 1372<br>875.6 - 11891 | 0.90                | 0.01 *              | 6375<br>1017 - 11679  | 2727<br>598.3 - 3712  | 2627<br>1448 - 5406  | 0.06                | 0.07                |
| <b>GM-CSF</b>                 | 214.7<br>76.5 - 2584  | 314.8<br>175 - 492.2  | 116.8<br>48.9 - 2747  | 1.0                 | 0.02 *              | 486.9<br>152.5 - 1516 | 147.2<br>42 - 427.2   | 245.8<br>175 - 595.5 | 0.03 *              | 0.06                |

|                                   |               |               |               |        |        |               |               |               |        |      |
|-----------------------------------|---------------|---------------|---------------|--------|--------|---------------|---------------|---------------|--------|------|
| <b>IFN<math>\gamma</math></b>     | 257.0         | 835.8         | 467.3         | 0.02 * | 0.65   | 233.4         | 133.9         | 416.4         | 0.06   | 0.39 |
|                                   | 37.6 - 5157   | 266.9 - 5830  | 219.6 - 983.8 |        |        | 28.5 - 2524   | 49.1 - 983    | 29 - 807.8    |        |      |
| <b>IP-10</b>                      | 1430          | 11596         | 1201          | 0.17   | 0.43   | 1282          | 20133         | 9222          | 0.23   | 0.76 |
|                                   | 157.4 - 36114 | 398.1 - 18355 | 315.6 - 25330 |        |        | -30.8 - 17084 | 4289 - 36155  | 3964 - 18476  |        |      |
| <b>CCL3</b>                       | 29972         | 29608         | 13635         | 0.52   | 0.03 * | 27820         | 9218          | 20029         | 0.03 * | 0.08 |
|                                   | 8888 - 95230  | 12920 - 65686 | 3968 - 24054  |        |        | 5995 - 49179  | 4119 - 33611  | 10720 - 26486 |        |      |
| <b>CCL4</b>                       | 14046         | 8279          | 5293          | 0.64   | 0.01 * | 8037          | 6860          | 6993          | 0.45   | 0.25 |
|                                   | 3428 - 20732  | 4556 - 11353  | 2165 - 8015   |        |        | 2947 - 16094  | 3128 - 11886  | 4756 - 11283  |        |      |
| <b>CCL5</b>                       | 2179          | 3210          | 2580          | 0.28   | 0.20   | 4122          | 2288          | 4443          | 0.76   | 0.42 |
|                                   | 486.2 - 7919  | 1719 - 7681   | 1486 - 3616   |        |        | 871.8 - 7449  | 636.5 - 14529 | 1981 - 16442  |        |      |
| <b>IL-8<br/>(Elisa)<br/>ng/ml</b> | 54            | 54.5          | 47            | 0.77   | 0.69   | 57            | 52            | 50            | 0.43   | 0.55 |
|                                   | 13 - 63       | 0 - 64.3      | 0 - 59.8      |        |        | 39 - 65.5     | 34 - 62       | 39 - 62       |        |      |

### Legend for Supplementary Table 2:

Results shown are cytokine/chemokine concentrations assayed with Luminex multiplex subtracting concentration in unstimulated PBMC cultures from concentration in cultures of PBMC stimulated with heat-killed H37Rv for 24 hrs. Median and interquartile range values are presented and units are pg/ml. The exception was IL-8 which was assayed using ELISA and units are in ng/ml. P-values were calculated for comparisons between 0 and 2 weeks values and 0 and 4 week values for each treatment group separately using Wilcoxon matched pairs test. Two patients in the placebo-treated arm switched to open label prednisone at week 2 and thus their week 4 sample was excluded from analysis.

Significant differences are indicated with \*. After Bonferroni correction for multiple comparisons ( $p_{corr} = p \times 17 - 1 = p \times 16$ ) none of the differences remained significant.

| Cytokines    | Placebo (n=9)          |                        |                        |                          |                          | Prednisone (n=16)      |                        |                        |                          |                          |
|--------------|------------------------|------------------------|------------------------|--------------------------|--------------------------|------------------------|------------------------|------------------------|--------------------------|--------------------------|
|              | Week 0                 | Week 2                 | Week 4                 | p-value<br>(Week 0 vs 2) | p-value<br>(Week 0 vs 4) | Week 0                 | Week 2                 | Week 4                 | p-value<br>(Week 0 vs 2) | p-value<br>(Week 0 vs 4) |
| TNF $\alpha$ | 8.65<br>(7.85-9.17)    | 8.99<br>(8.67-9.61)    | 8.40<br>(6.00-9.04)    | 0.05                     | 1.00                     | 8.63<br>(7.54-9.86)    | 8.82<br>(8.35-9.77)    | 8.80<br>(8.12-9.11)    | 0.36                     | 0.56                     |
| IL-6         | 12.34<br>(10.55-15.88) | 14.38<br>(12.48-15.29) | 13.94<br>(8.58-17.09)  | 0.08                     | 1.00                     | 12.79<br>(11.81-14.55) | 16.47<br>(13.30-17.37) | 14.01<br>(12.81-18.04) | 0.04                     | 0.42                     |
| IL-12p40     | 17.07<br>(15.35-17.83) | 17.26<br>(15.89-18.33) | 17.03<br>(12.58-19.24) | 0.58                     | 0.44                     | 17.22<br>(16.22-17.87) | 17.49<br>(15.99-19.11) | 17.60<br>(15.88-18.04) | 0.63                     | 0.93                     |
| IL-10        | 6.89<br>(6.58-7.62)    | 6.98<br>(6.64-7.75)    | 8.08<br>(7.53-11.47)   | 0.84                     | 0.09                     | 7.76<br>(6.37-9.65)    | 7.64<br>(7.09-9.17)    | 8.08<br>(6.56-11.16)   | 0.68                     | 0.56                     |

**Supplementary Table 3: RT-PCR experiments showing delta Ct (Ct gene of interest – Ct  $\beta$ -actin) values of unstimulated samples after 24-hour cell culture. Statistical comparisons were made between week 0 and 2 and between week 0 and 4 values for placebo- and prednisone-treated participants separately.**

**Legend for Supplementary Table 3:**

Values shown are median (IQR) of delta Ct values.

The paired Wilcoxon signed-rank test was used to compare medians.

**Supplementary Table 4: Serum Luminex multiplex assay comparing the change (or delta) in concentrations of cytokines/chemokines between week 0 and week 2 for those participants who had symptom improvement over this period to those who had no improvement or deteriorated.**

| Cytokine/chemokine            | Non-improvers<br>(n= 20) | Improvers<br>(n=35)     | p-value |
|-------------------------------|--------------------------|-------------------------|---------|
| <b>TNF<math>\alpha</math></b> | -17.8<br>(-31.0; 0)      | -15.8<br>(-29.5; -7.4)  | 0.69    |
| <b>IFN<math>\gamma</math></b> | -9.1<br>(-19.3; 0.7)     | 0<br>(-15.3; 6.0)       | 0.14    |
| <b>GM-CSF</b>                 | 0<br>(0; 0)              | 0<br>(0; 0)             | 0.72    |
| <b>IL-1<math>\beta</math></b> | 0<br>(0; 0)              | 0<br>(0; 0)             | 0.73    |
| <b>IL-2</b>                   | 0<br>(0; 0)              | 0<br>(0; 0)             | 0.07    |
| <b>IL-6</b>                   | -17.7<br>(-34.0; 0.8)    | -15.7<br>(-23.4; -8.1)  | 0.90    |
| <b>IL-8</b>                   | -7.6<br>(-58.9; 17.6)    | -15.9<br>(-43.6; 3.6)   | 0.76    |
| <b>IL-10</b>                  | -4.0<br>(-9.4; -0.2)     | -3.7<br>(-8.1; 0)       | 0.89    |
| <b>IL-12</b>                  | -12.4<br>(-25.3; 0)      | -8.0<br>(-29.4; 0)      | 0.78    |
| <b>IP-10</b>                  | -890.7<br>(-2480; -1.5)  | -727.7<br>(-2478; 66.5) | 0.84    |
| <b>CCL3</b>                   | -1.4<br>(-33.5; 5.5)     | 0<br>(-11.3; 21.4)      | 0.10    |
| <b>CCL4</b>                   | -9.2<br>(-30.0; 15.4)    | -14.3<br>(-32.5; 10.2)  | 0.62    |

**Legend for Supplementary Table 4:**

Values shown are the median (IQR) of the delta (week 2 – week 0) for each of 12 serum cytokines/chemokines measured.

Statistical comparisons were performed using the Wilcoxon signed-rank test.
